# Supplementary material for: Computational Binding Study Hints at Ecdysone 20-Mono-Oxygenase as the Hitherto Unknown Target for Ring C-Seco Limonoid-Type Insecticides
Source: MDPI journal article supplement (doi:10.3390/molecules29071628), 2024-04-05
Supplement: s1 [file s1]

## Supplementary Information

### Computational binding study hints at ecdysone 20-mono-oxygenase as the hitherto unknown target for ring C-seco limonoid-type insecticides

Ramsés E. Ramírez, Ricardo E. Buendia-Corona, Ivonne Pérez Xochipa, Thomas Scior

The protein sequence of the target enzyme E20MO was obtained from the Uniprot database (Q9VUF8) for the fruit fly (*Drosophila melanogaster*).

**Table S1.** Listing of target protein E20MO (first entry) and eight preselected PDB entries of liganded complexes as possible 3D templates for modeling of structurally unknown target E20MO sorted by % ID > ID. The selection criterion was the percentage identity score (% id) by MSA (Blast-P). In bold face appears the final selection (PDB entry **4ZGX**). Ligand QHC, short for: N - [(8R) -4- (4-chloro-3-fluorophenyl) -5,6,7,8-tetrahydroisoquinolin-8-yl] propanamide.

| PDB ID                                     | Organism                                      | Sequence coverage %                       | % id | Ligand                                                                                                      |
|--------------------------------------------|-----------------------------------------------|-------------------------------------------|------|-------------------------------------------------------------------------------------------------------------|
| Target E20MO<br>(PDB entry does not exist) | <i>Drosophila melanogaster</i><br>(Fruit fly) | 540 aa.<br><br>Uniprot entry code: Q9VUF8 | 100% | Ecdysone<br>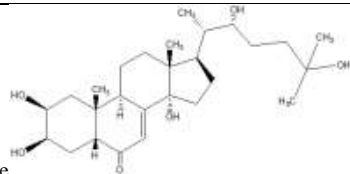            |
| 4R20<br>CytochromeP450 17a<br>[15]         | <i>Danio rerio</i><br>(Zebra fish)            | 32%,<br>486 aa.                           | 29%  | Abiraterone<br>         |
| 3CBD<br>Octane monooxygenase<br>[16]       | <i>Bacillus megaterium</i>                    | 40%<br>455 aa.                            | 27%  | N-palmitoglicina<br>    |
| 5VBU:<br>CytochromeP450 21a2               | <i>Homo sapiens</i>                           | 31%<br>476 aa.                            | 27%  | Hydroxyprogesterone<br> |

|                                                       |                                 |                 |     |                                                                                                         |
|-------------------------------------------------------|---------------------------------|-----------------|-----|---------------------------------------------------------------------------------------------------------|
| [17]                                                  |                                 |                 |     | 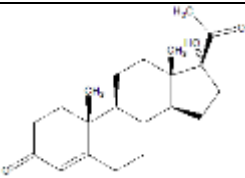                      |
| <b>4ZGX:</b><br>aldosteronesynt<br>hase<br>[18]       | <i>Homo sapiens</i>             | 68%<br>489 aa.  | 26% | QHC<br>               |
| 5OG9;<br>WIFI-WC<br>complex<br>[19]                   | <i>Bacillus megaterium</i>      | 40%<br>473 aa.  | 26% | Testosterone<br>      |
| 5EAF: CYP51<br>[20]                                   | <i>Saccharomyces cerevisiae</i> | 42%<br>539 aa.  | 23% | Fluconazole<br>      |
| 5JL9:<br>CYP19A1<br>[21]                              | <i>Homo sapiens</i>             | 84%<br>503 aa.  | 21% | Androstenedione<br> |
| 4UYL:<br>essterol 14-<br>alpha<br>demethylase<br>[22] | <i>Neosartorya fumigata</i>     | 43%,<br>470 aa. | 21% | Voriconazole<br>    |

**Table S2.** Listing of three hits among heme-containing enzymes (CYPs) with structurally related ligands to ecdysone target ligand in the PDB database.

| PDB ID                                  | Organism                                 | Sequence coverage, aa length | % id | Ligands                                                                                                                     |
|-----------------------------------------|------------------------------------------|------------------------------|------|-----------------------------------------------------------------------------------------------------------------------------|
| 4GQS CYP<br>2C19<br>[23]                | <i>Homo sapiens</i>                      | 45%,<br>477aa.               | 26%  | OXV<br>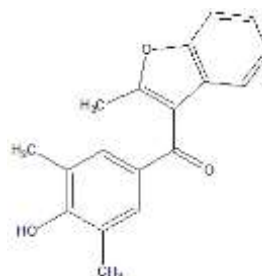                                   |
| 3G5N:<br>cytochrome<br>P450 2B4<br>[24] | <i>Oryctolagus cuniculus</i><br>(Rabbit) | 45%<br>476 aa.               | 26%  | 1-(biphenyl-4-ylmethyl)-1H-imidazol<br> |
| 4NY4:<br>CYP3A4<br>[25]                 | <i>Homo sapiens</i>                      | 89%<br>484 aa.               | 23%  | 2QH<br>                                 |

**Table S3.** Ligands chemically related to limonoids. Out of 841 PDB hits, seven structures were retained.

| PDB ID                   | Ligand      |
|--------------------------|-------------|
| 5FOI<br>[35]<br>EC: 1.14 | Micinamicin |

|                                 |                                                                                                              |
|---------------------------------|--------------------------------------------------------------------------------------------------------------|
|                                 | 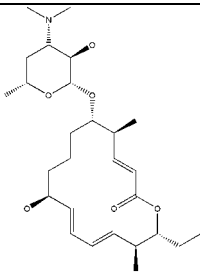                           |
| 3SN5<br>[36]<br>EC: 1.14.14.23  | colest-4-en-3-one<br>      |
| 1DZ4<br>[37]<br>EC: 1.14.15.1   | Camfor<br>                 |
| 1T2B<br>[38]<br>EC: 1.14.14.133 | Tropan<br>               |
| 4DVQ<br>[39]<br>EC: 1.14.15.5   | Desoxicorticosterona<br> |
| 4WNU<br>[40]<br>EC: 1.14.14.1   | Quinidina<br>            |
| 4WNV                            | Quinina                                                                                                      |

|                                  |                                                                                    |
|----------------------------------|------------------------------------------------------------------------------------|
| <p>[40]</p> <p>EC: 1.14.14.1</p> | 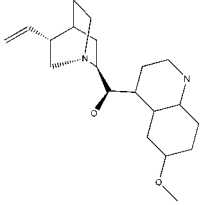 |
|----------------------------------|------------------------------------------------------------------------------------|

**Table S4.** Reference molecule ecdysone and related PDB ligands interacting at protein binding sites with heme group of enzymes of the CYP family (EC: 1.14).

| Ligand                              | Structure                                                                           | Features                                                                                                                                                                                                                                                                                                                                                                                                                                                                                 |
|-------------------------------------|-------------------------------------------------------------------------------------|------------------------------------------------------------------------------------------------------------------------------------------------------------------------------------------------------------------------------------------------------------------------------------------------------------------------------------------------------------------------------------------------------------------------------------------------------------------------------------------|
| Ecdysone                            | 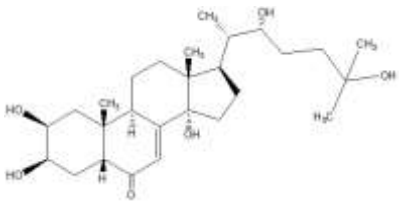   | <p>Formula: C<sub>27</sub> H<sub>44</sub> O<sub>6</sub></p> <p>Atoms: 77</p> <p>Molecular weight: 464,635 Daltons</p> <p>Total surface area (TSA): 726.3 Å<sup>2</sup><br/>(ds = 15.2 Å)</p> <p>Polar surface area (PSA): 227.3 Å<sup>2</sup><br/>(apolar = 499.0 Å<sup>2</sup>)</p> <p>Molecular volume: 457.2 Å<sup>3</sup> (dv = 9.6 Å)</p> <p>PSA / TSA: 0.3129</p> <p>Rotatable bonds (ROBO): 10</p> <p>Non rotatable bonds (NRB): 0</p> <p>Aromatic carbons: 0</p> <p>Rings: 4</p> |
| Colest-4-en-3-one (PDB<br>ID: 3SN5) |  | <p>Formula: C<sub>27</sub> H<sub>44</sub> O</p> <p>Atoms: 72</p> <p>Molecular weight: 384,638 Daltons</p> <p>TSA: 682.6 Å<sup>2</sup> (ds = 14.7 Å)</p> <p>PSA: 45.6 Å<sup>2</sup> (apolar = 637.0 Å<sup>2</sup>)</p>                                                                                                                                                                                                                                                                    |

|                                                          |                                                                                     |                                                                                                                                                                                                                                                                                                                                                                                                |
|----------------------------------------------------------|-------------------------------------------------------------------------------------|------------------------------------------------------------------------------------------------------------------------------------------------------------------------------------------------------------------------------------------------------------------------------------------------------------------------------------------------------------------------------------------------|
|                                                          |                                                                                     | <p>Molecular volume: 415.5 Å<sup>3</sup> (dv = 9.3 Å)</p> <p>PSA / TSA: 0.0668</p> <p>ROBO: 5</p> <p>NRB: 0</p> <p>Aromatic carbons: 0</p> <p>Rings: 4</p>                                                                                                                                                                                                                                     |
| <p>Mycinamicin (PDB ID: 5FOI)</p>                        | 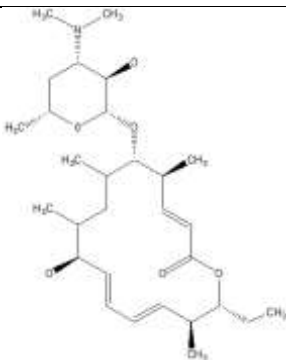   | <p>Formula: C<sub>29</sub> H<sub>47</sub> N O<sub>6</sub></p> <p>Atoms: 83</p> <p>Molecular weight: 505,687 Daltons</p> <p>TSA: 783.0 Å<sup>2</sup> (ds = 15.8 Å)</p> <p>PSA: 93.0 Å<sup>2</sup> (apolar = 690.0 Å<sup>2</sup>)</p> <p>Molecular volume: 499.8 Å<sup>3</sup> (dv = 9.8 Å)</p> <p>PSA / TSA: 0.1188</p> <p>ROBO: 4</p> <p>NRB: 0</p> <p>Aromatic carbons: 0</p> <p>Rings: 2</p> |
| <p>Azadirachtin A (no PDB code, structure optimized)</p> |  | <p>Formula: C<sub>35</sub> H<sub>44</sub> O<sub>16</sub></p> <p>Atoms: 95</p> <p>Molecular weight: 720,714 Daltons</p> <p>TSA: 861.1 Å<sup>2</sup> (ds = 16.6 Å)</p> <p>PSA: 211.1 Å<sup>2</sup> (apolar = 650.0 Å<sup>2</sup>)</p> <p>PSA / TSA: 0.245</p> <p>ROBO: 13</p> <p>NRB: 0</p> <p>Aromatic carbons: 2</p>                                                                           |

|                                                                                     |                                                                                    |                                                                                                                                                                                                                                                                                                                                                                                                      |
|-------------------------------------------------------------------------------------|------------------------------------------------------------------------------------|------------------------------------------------------------------------------------------------------------------------------------------------------------------------------------------------------------------------------------------------------------------------------------------------------------------------------------------------------------------------------------------------------|
|                                                                                     |                                                                                    | Rings: 6                                                                                                                                                                                                                                                                                                                                                                                             |
| 1-cinamoylmelianolone                                                               | 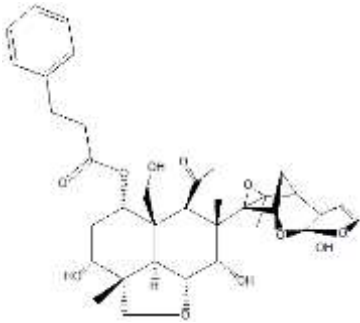  | <p>Formula: C<sub>35</sub> H<sub>42</sub> O<sub>11</sub></p> <p>Atoms: 88</p> <p>Molecular weight: 638,701 Daltons</p> <p>TSA: 832.3 Å<sup>2</sup> (ds = 16.3 Å)</p> <p>PSA: 224.0 Å<sup>2</sup> (apolar = 608.3 Å<sup>2</sup>)</p> <p>Molecular volume: 576.6 Å<sup>3</sup> (dv = 10.3 Å)</p> <p>PSA / TSA: 0.2691</p> <p>ROBO: 11</p> <p>NRB: 0</p> <p>Aromatic carbons: 8</p> <p>Rings: 6</p>     |
| <p>QHC (PDB ID: 4ZGX)</p> <p>This is the 3D template for target model E20MO4ZGX</p> |  | <p>Formula: C<sub>18</sub> H<sub>18</sub> N<sub>2</sub> O F Cl</p> <p>Atoms: 41</p> <p>Molecular weight: 332,800 Daltons</p> <p>TSA: 544.7 Å<sup>2</sup> (ds = 13.2 Å)</p> <p>PSA: 64.0 Å<sup>2</sup> (apolar = 480.7 Å<sup>2</sup>)</p> <p>Molecular volume: 287.5 Å<sup>3</sup> (dv = 8.2 Å)</p> <p>PSA / TSA: 0.1175</p> <p>ROBO: 3</p> <p>NRB: 1</p> <p>Aromatic carbons: 11</p> <p>Rings: 3</p> |

**Table S5.** Listing of maximum and minimum free energies of binding to target model E20MO4ZGX. Asterisk symbols: \* Reference ligand QHC was back docked against its crystal structure 4ZGX which was also the 3D template for target model generation by homology (**values in bold face**); \*\* Ligand QHC blind docked against 3D model of target E20MO4ZGX.

| Ligand       | Free Energy of Binding ( $\Delta G$ )<br>[kcal/Mol] | Inhibition constant ( $K_i$ )<br>[nM] |
|--------------|-----------------------------------------------------|---------------------------------------|
| I            | -9                                                  | 136                                   |
| II           | -10                                                 | 37                                    |
| III          | -10                                                 | 23                                    |
| IV           | -12.                                                | 4                                     |
| V            | -13                                                 | 1                                     |
| VI           | -11                                                 | 18                                    |
| VII          | -12                                                 | 3                                     |
| VIII         | -11                                                 | 19                                    |
| IX           | -9                                                  | 473                                   |
| Ecdisone (X) | -12                                                 | 32                                    |
| QHC *        | <b>-11</b>                                          | <b>4</b>                              |
| QHC **       | -9                                                  | 91                                    |



In **Figures S1 to S10** pairwise superpositions of the final docked poses for all nine limonoid ligands (magenta) and the reference ligand ecdysone (green) at the binding site of target Ecdysone 20-monoxygenase. Green tubes H-Bond, Yellow tubes  $\pi$ - $\pi$  interactions, by molecular modeling software UCSF Chimera 09.

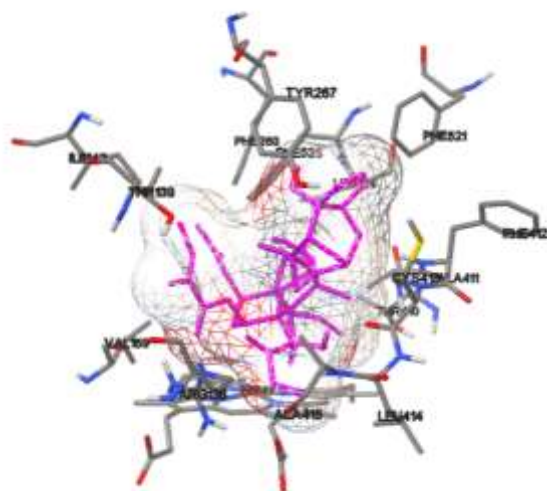

**Figure S1. I Azadirachtin A.**

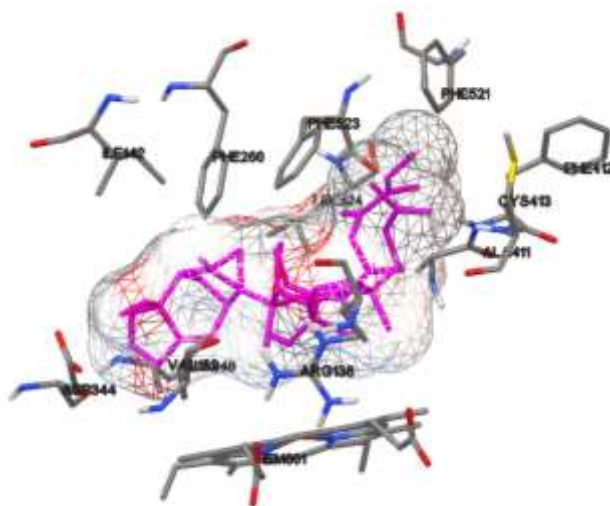

**Figure S2. II Azadirachtin D**

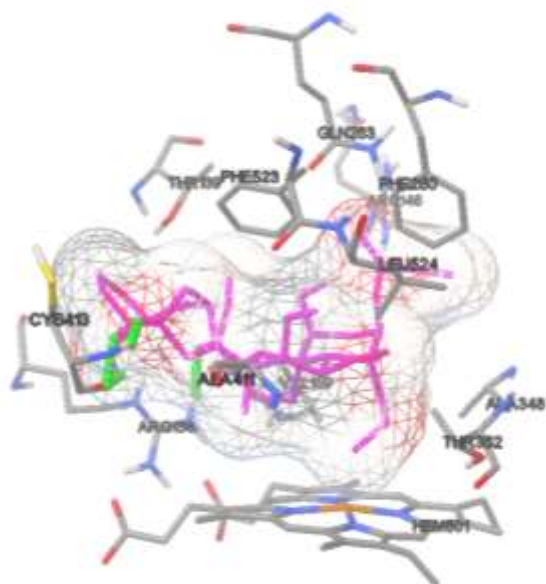

Figure S3. III Azadirachtin G

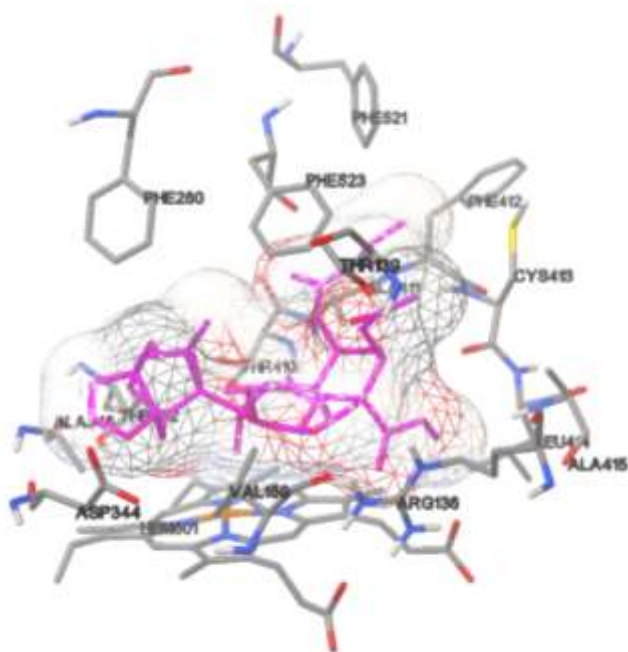

Figure S4. IV Azadirachtin K

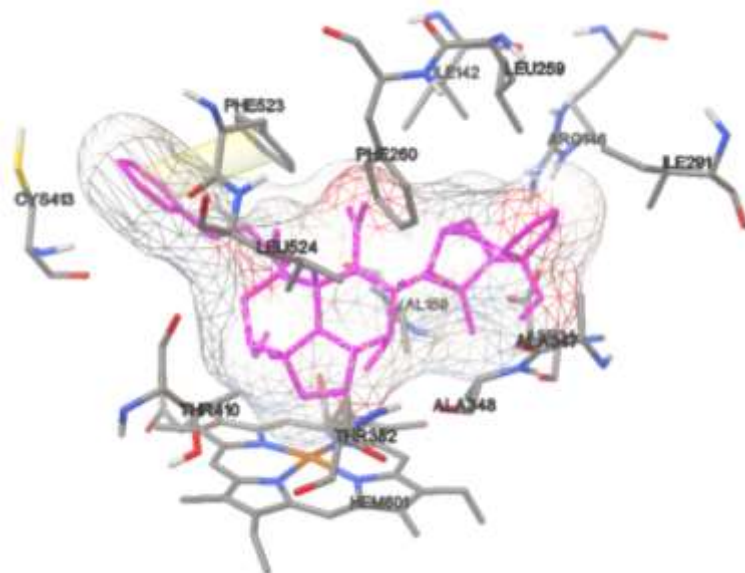

Figure S5. V 1-Cinnamoylmelianolone

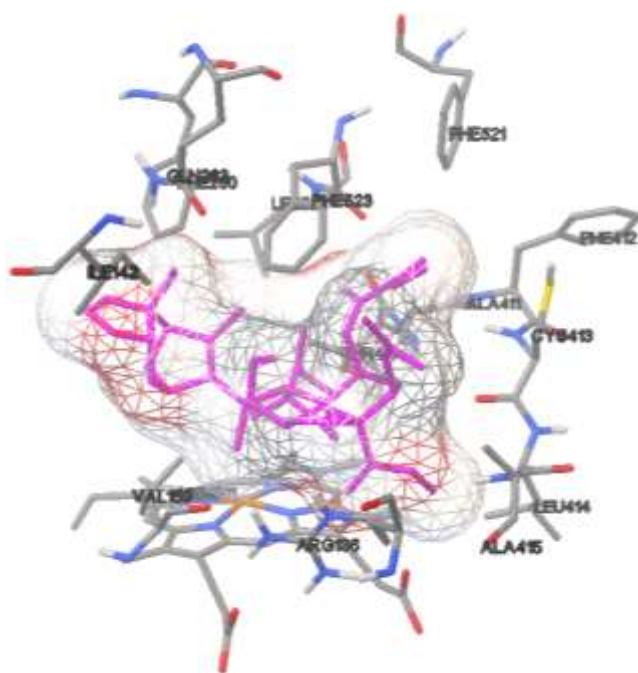

Figure S6. VI 13,14-Desepoxyzadirachtin A

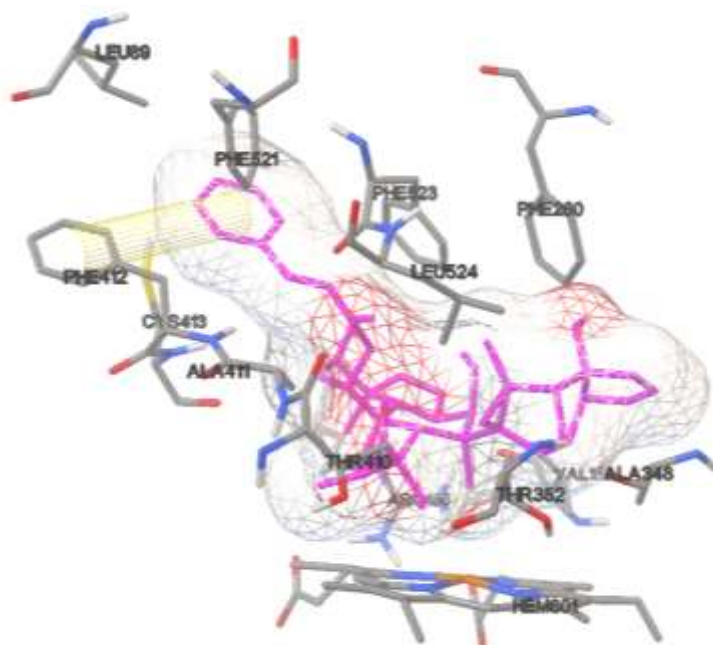

**Figure S7.** VII 1-Cinnamoyl-3,11-Dihydroxymeliacarpin

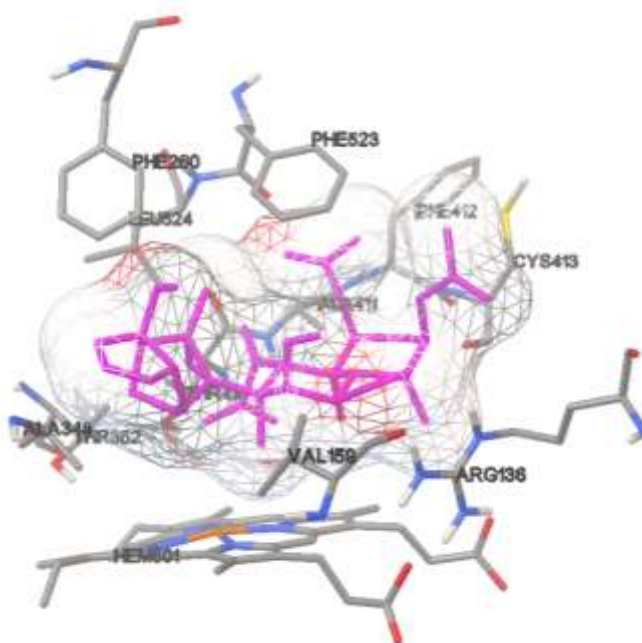

**Figure S8.** VIII 1,3,-Diacetyl-11,19-Deoxa-11-Oxomeliacarpin

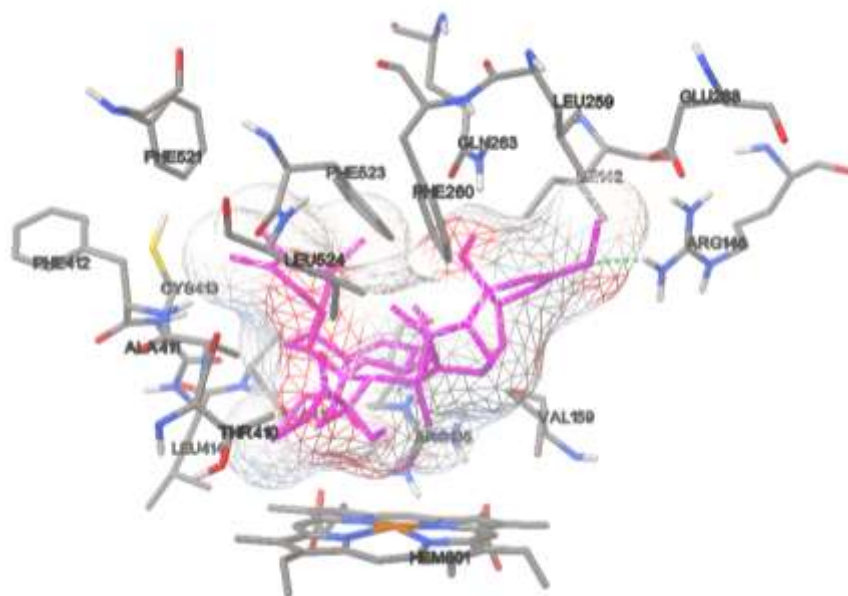

Figure S9. IX Vepaol

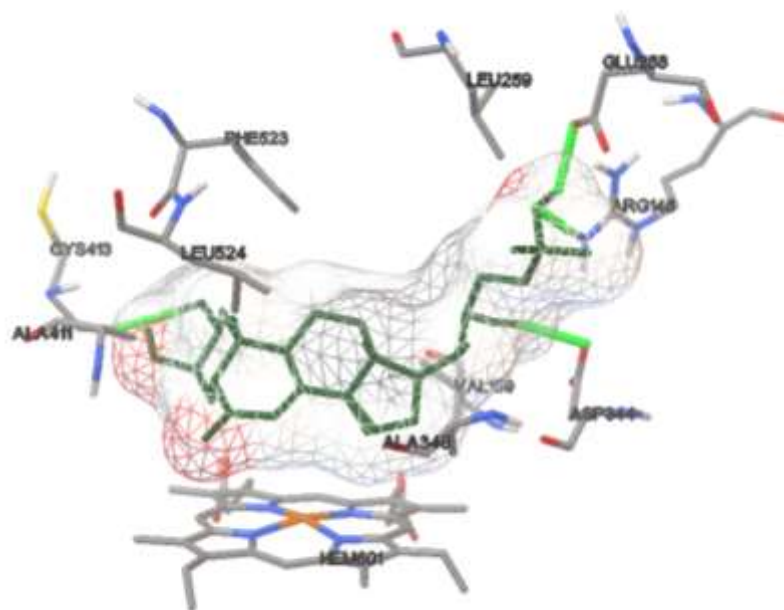

Figure S10. X Ecdysone
